# Supplementary material for: Comparisons of short-term and survival outcomes of laparoscopy-assisted versus open total gastrectomy for gastric cancer patients
Source: PubMed Central journal article supplement (PMC5581035; doi:10.18632/oncotarget.17019), 2017-04-10
Supplement: oncotarget-08-52366-s001.pdf [file oncotarget-08-52366-s001.pdf]

## Comparisons of short-term and survival outcomes of laparoscopy-assisted versus open total gastrectomy for gastric cancer patients

### Supplementary Materials

**Supplementary Table 1: Recommended postgastrectomy follow-up program**

| Postoperative month                   | 03                                              | 06 | 09 | 12 | 18 | 24 | 30 | 36 | 42 | 48 | 54 | 60 |
|---------------------------------------|-------------------------------------------------|----|----|----|----|----|----|----|----|----|----|----|
| OS status                             | ×                                               | ×  | ×  | ×  | ×  | ×  | ×  | ×  | ×  | ×  | ×  | ×  |
| CT <sup>[a]</sup>                     |                                                 | ×  |    | ×  | ×  | ×  |    | ×  |    | ×  |    | ×  |
| Ultrasound                            | ×                                               | ×  |    | ×  |    | ×  |    | ×  |    | ×  |    | ×  |
| Endoscopy                             |                                                 |    |    | ×  |    | ×  |    | ×  |    | ×  |    | ×  |
| Serology <sup>[b]</sup>               | ×                                               | ×  |    | ×  |    | ×  |    | ×  |    | ×  |    | ×  |
| Others <sup>[c]</sup> , and the above | Relevant symptom or PE sign driving at any time |    |    |    |    |    |    |    |    |    |    |    |

[a] Enhanced MDCT for abdomen, non-enhanced CT for thorax.

[b] BRT and SMA, mandatory; CA724, CEA, and CA199, selected.

[c] PET/CT, bone scan, brain MRI.
